# Supplementary material for: Identification of Genetic Loci for Sugarcane Leaf Angle at Different Developmental Stages by Genome-Wide Association Study
Source: Front Plant Sci. 2022 May 27;13:841693. doi: 10.3389/fpls.2022.841693 (PMC9185841; doi:10.3389/fpls.2022.841693)
Supplement: Supplementary Table 1 — Leaf angle and corresponding genotypes of sugarcane natural population at different stages. [file Table_1.XLSX]

## Sheet: Table S1
#	Family	Name	M2+	M3+	SH2+	SH3+	SH4+	CH2+	CH3+	CH4+	SNP SS6A_102766953-G-C
1	Family1	AH1803	35.635	42.99	21.12	24.61	31.335	24.859	28.443	34.626
2	Family2	B8						35.891	43.147	44.564
3	Family3	BC2-32	25.875	30.27	16.125	18.805	23.6	16.7	19.325	21.7875
4	Family4	BH10-12	28.535	37.215	22.76	30.03	40.246	21.861	31.296	36.269
5	Family5	Badila
6	Family6	C323-68	30.15	35.66	20.13	26.625	35.26	20.58	27.22	29.195	C
7	Family7	C529-50	29.78	39.5	22.935	27.965	33.95	22.663	26.729	32.7	C
8	Family8	C86-456	26.01	32.48	16.79	20.135	26.7	20.447	21.6805	27.553
9	Family9	C88-380	32.925	38.405	28.685	35.205	44.535	27.748	30.382	40.702
10	Family10	C89-147	28.585	36.195	18.875	23.945	29.175	23.6708	27.1005	29.9333
11	Family11	C89-51	24.28	31.63	17.575	21.795	29.24	15.775	21.6917	27.7833	C
12	Family12	C90-317	28.339	35.35	18.83	25.44	30.295	20.029	24.028	29.043
13	Family13	C90-469	23.5115	31.594	20.9333	27.4633	36.25	22.7736	27.0331	31.8149
14	Family14	C90-530	33.075	38.565	21.74	25.76	33.78	25.7025	29.3438	32.8867
15	Family15	CP28-11-Sanya-Yacheng
16	Family16	CP49-50	26.984	34.47	23.155	28.685	33.595	27.6	32.0067	37.1337
17	Family17	CP57-614	22.014	29.548	14.41	17.085	22.59	15.649	16.915	20.002
18	Family18	CP63-588	27.67	30.505	20.425	25.68	31.395	15.92	17.975	21.953
19	Family19	CP67-412	27.995	32.26	18.87	22.85	27.77	23.209	26.913	28.773
20	Family20	CP70-1133	28.79	36.035	17.955	21.055	27.78	18.57	23.615	23.19
21	Family21	CP72-1210	29.56	38.055	20.148	24.615	27.92	23.5	26.3833	31.675
22	Family22	CP72-2086	29.795	33.725	16.67	22.865	32.96	24.188	26.195	30.166
23	Family23	CP72-383	29.685	35.62	17.7	21.738	27.685	19.503	23.442	29.074
24	Family24	CP73-1547	29.66	36.625	18.296	24.55	29.82	19.0813	21.9962	24.6863
25	Family25	CP75-1632	31.015	39.75	23.853	32.13	37.025	24.328	26.05	30.974
26	Family26	CP84-1198	25.77	30.59	18.45	20.855	25.825	21.84	25.15	28.515
27	Family27	CP85-1308	27.285	31.355	19.31	24.79	30.65	21.8	29.035	31.355
28	Family28	CP85-384	26.535	31.865				21.27	24.1938	32.76
29	Family29	CP89-2143	24.62	28.29	18.745	22.29	28.835	18.17	20.585	24.565
30	Family30	CP93-746	25.042	29.202	23.63	28.745	36.415	31.55	39.3833	41.5117
31	Family31	CPF237	31.73	37.345	14.485	18.355	23.225	19.295	22.475	32.46	G
32	Family32	Chuan-66-196	27.65	34.21	18.275	22.05	30.2	19.37	23.67	26.74	G
33	Family33	Chuan-73-219	23.61	31.68	14.025	19.495	26.67	14.565	23.06	25.97
34	Family34	Chuan-83-181	27.61	33.145	22.055	27.565	32.4	20.2	23.39	26.985
35	Family35	Chuan-86-665	33.18	36.525	27.885	34.055	39.2	30.725	33.68	40.465
36	Family36	Chuan-91-91						20.755	24.15	30.42
37	Family37	Chuantang-85-421	27.34	31.955	25.12	33.82	38.79	24.2387	28.0388	33.685
38	Family38	Co1001	22.895	31.28	23.225	26.44	31.245	18.612	23.03	25.445	C
39	Family39	Co281	27.2	35.665	17.105	25.04	36.535	20.815	29.273	43.813
40	Family40	Co331	30.745	37.02	20.215	26.26	31.235	16.285	18.89	24.38
41	Family41	Co419	29.99	36.79	20.78	28.64	35.135	22.326	24.885	28.752	C
42	Family42	Co740	23.695	29.11	17.96	23.865	34.015	15.77	21.045	21.93
43	Family43	Dezhe-03-83	27.64	34.64	19.585	25.205	29.125	31.393	36.324	40.58
44	Family44	F108-Sanya-Yacheng
45	Family45	F134	34.575	40.66	22.28	25.745	33.535	19.6	22.0458	25.3292	C
46	Family46	F146	31.46	35.875	20.865	25.49	31.305	22.815	27.065	30.46
47	Family47	F160						28.65	29.955	37.51
48	Family48	Fu_nong-02-3924	29.025	32.102	17.05	22.305	33.23	19.113	20.079	24.428
49	Family49	Fu_nong-07-14	26.596	30.685	17.625	22.32	27.71	15.65	20.405	22.17
50	Family50	Fu_nong-38	37.24	47.74	21.49	26.9	33.74	31.885	40.043	48.42
51	Family51	Fu_nong-40	31.25	37.7	18.195	21.675	27.02	20.7	22.98	24.465
52	Family52	Fu_nong-83-36	26.08	33.92	23.75	30.2	32.98	18.925	21.897	23.161
53	Family53	Fu_nong-91-23	36.505	45.41	24.645	30.34	34.01	26.06	30.65	35
54	Family54	Fu_nong-95-1702	29.33	38.76	23.605	27.215	35.04	22.425	24.075	27.48
55	Family55	GN-05-352	33.98	43.455	18.815	22.77	27.455	22.095	23.715	27.9
56	Family56	GN-79-216	25.27	30.08	18.99	24.085	29.245	17.965	21.66	26.48
57	Family57	GT-01-122	28.505	31.62	20.045	24.37	29.495	16.86	20.315	25.415
58	Family58	GT-02-281	31	38.6	19.87	24.22	31.49	28.53	31.4	33.32
59	Family59	GT-02-467	25.675	33.165	23.565	28.65	34.78	32.725	47.8	45.2
60	Family60	GT-02-761	24.785	31.145	16.205	20.64	26.895	16.076	17.745	20.665
61	Family61	GT-02-901	34.125	42.615	22.655	33.79	45.61	34.888	41.633	49.823
62	Family62	GT-03-11						33.2	39.025	48.3125
63	Family63	GT-03-1403	25.62	32.38	17.32	22.42	30.4	23.1125	24.8075	30.0263
64	Family64	GT-03-1453	29.46	36.805	21.71	26.95	33.24	23.1	24.89	28.21
65	Family65	GT-03-411	24.22	29.88	18.24	22.27	25.23	18.4688	21.2521	25.35
66	Family66	GT-03-8	23.975	33.19	22.645	27.385	31.855	19.765	24.042	26.835
67	Family67	GT-03-91	24.34	31.25	13.335	16.76	24.715	17.816	19.853	24.038
68	Family68	GT-05-3084	32.2	40.6	16.675	18.0263	26.61	17.745	19.955	22.63
69	Family69	GT-69-156	27.19	37.155	17.615	21.545	25.755	17.7	20.4187	23.9187
70	Family70	GT-97-69	32.93	38.795	21.41	26.82	31.86	18.435	21.98	27.92
71	Family71	Gan-14	32.593	38.42	19.66	24.115	32.595	19.49	23.825	32.025
72	Family72	Gan-65-542	40.055	44.399	27.705	34.545	41.2	31.58	38.975	44.165
73	Family73	Gan-8	33.905	42.685	20.285	24.59	32.26	24.611	30.685	44.74
74	Family74	Gan-81-1035	26.05	29.36	17.735	23.33	31.39	20.25	24.875	27.15
75	Family75	Gui-83-492	20.95	25.21	18.355	21	25.21	24.8648	26.0008	30.6992
76	Family76	Gui-86-267	29.755	32.41	20.43	23.79	29.38	21.275	23.6313	29.7888
77	Family77	Gui-89-159	35.43	43.53	25.57	31.93	38.36	31.1635	38.1865	39.356
78	Family78	HOCP00-1142	31.715	37.08	21.61	27.035	33.87	32.4625	33.6688	36.0063
79	Family79	HOCP00-2218	34.835	43.995	23.485	29.65	37.18	21.2665	25.048	29.1375
80	Family80	HOCP01-517	30.471	35.176	23.85	30.77	36.915	25.725	28.332	32.359
81	Family81	HOCP01-564	36.28	40.21	27.215	34.565	40.355	26.788	32.514	37.949
82	Family82	HOCP02-610	35.545	46.83	21.77	26.505	29.31	24	25.98	28.871
83	Family83	HOCP02-623	28.565	38.345	17.85	23.805	28.09	17.1617	31.54	35.3033
84	Family84	HOCP03-704	36.8	47.6	17.565	19.745	26.81	21.8465	25.4777	27.1714
85	Family85	HOCP03-708	21.66	29.055	14.885	19.095	27.59	16.999	20.711	23.561
86	Family86	HOCP03-716	32.88	39.638	22.215	27.16	33.11	27.629	30.461	36.322
87	Family87	HOCP05-902	38.866	44.09	26	29.69	35.965
88	Family88	HOCP07-612	35.17	43.645	21.98	30.16	34.82	25.413	35.675	43.528
89	Family89	HOCP07-613	34.285	40.505	29.07	33.7563	43.835	38.329	50.514	58.2
90	Family90	HOCP07-617	25.425	30.87	17.155	22.245	27.925	17.35	19.315	24.21
91	Family91	HOCP91-555	29.73	32.92	23.88	29.995	32.78	23.418	25.431	32.442
92	Family92	Haizhe-22	27.615	33.14	20.05	23.895	29.53	18.665	21.01	24.225
93	Family93	HoTH344	30.43	37.22	18.815	23.92	27.41	21.315	20.37	24.96
94	Family94	HoTH409	29.9	35.9	20.18	23.23	28.46	16.815	21.075	26.55
95	Family95	Hua_nan-56-12	25.64	32.74	20.16	25.025	30.375	20.195	23.44	28.72
96	Family96	Hua_nan-56-21-Sanya-Yacheng
97	Family97	Huang-pi_Guozhe
98	Family98	KeWu	33.49	42.195	20.265	26.72	32.855	26.15	30.87	36.948
99	Family99	Lianghe-78-85	28.105	37.285	22.2	28.38	35.48	26.97	30.525	36.69
100	Family100	Liucheng-03-48	27.045	35.015	24.77	29.725	34.155	20.8188	24.8	29.9688
101	Family101	Liucheng-04-36	25.905	31.12	16.535	20.075	25.23	22.74	25.54	29.585
102	Family102	Liucheng-05-128	25.915	31.025	16.085	19.28	23.445	13.941	15.458	15.943
103	Family103	Liucheng-05-291	21.475	28.415	17.745	21.995	26.725	15.49	18.79	20.8
104	Family104	Liucheng-06-241	22.765	27.875	17.82	23.055	27.83	13.077	14.486	15.857
105	Family105	Liucheng-07-206	27.22	27.76	20.835	25.02	30.3	23.396	25.286	28.662
106	Family106	M142-59	25.835	34.19	21.005	26.12	29.99	19.54	21.715	24.505
107	Family107	M93-48	25.175	31.845	17.66	22.36	27.28	20.095	22.235	25.985
108	Family108	NCo310	28.54	35.715	18.145	20.535	26.575	16.7937	19.4425	24.32
109	Family109	Neijiang-57-416	20.905	25.35	18.325	23.015	28.45	17.2688	20.8562	26.3875
110	Family110	Neijiang-94-128	30.48	34.99	23.99	33.01	37.79	35.4925	38.5887	44.4338
111	Family111	PINDAR	27.586	31.56	21.715	25.1	29.77	21.855	24.045	30.11
112	Family112	Phi140-19	24.75	29.965	18.26	23.32	32.75	21.005	24.462	31.371
113	Family113	Q117	26.14	31.235	21.275	26.305	32.74	18.905	23.035	26.995
114	Family114	Q141	28.225	36.425	17.81	23.09	30.395	21.728	28.165	32.134
115	Family115	Q171	28.973	35.31	18.105	24.525	28.665
116	Family116	Q190	30.015	35.065	24.03	30.115	36.565	28.2292	29.5688	32.8517
117	Family117	Q202	27.388	33.763	23.17	29.25	35.12	24.729	31.013	39.956
118	Family118	Q206	28.53	33.495	20.03	25.175	29.725	24.675	29.535	31.381
119	Family119	Q207	26.64	32.065	17.64	20.37	24.075	24.934	26.125	26.0267
120	Family120	Q208	29.495	36.06	18.225	23.585	30.085	19.24	22.47	26.725
121	Family121	R0C1-Sanya-Yacheng
122	Family122	R570	35.113	44.225	23.65	26.905	35.56	23.445	27.96	31.095	C
123	Family123	RB72-454	28.62	35.68	17.45	24.24	29.29	23.445	33.07	37.29
124	Family124	ROC20	33.71	39.41	21.805	25.96	29.765	23.25	25.89	28.235
125	Family125	ROC28	29.505	34.555	25.716	31.285	38.295	20.175	23.31	27.56
126	Family126	TH10	27.67	33.153	19.25	23.56	26.895	15.9333	18.65	21.55	G
127	Family127	Trition	34.2	38.865	24.1	30.89	37.545	26.7	28.375	34.875
128	Family128	Xuan-15	24.12	28.19	14.975	18.53	25.61	19.05	24.1562	24.6562
129	Family129	YCE01-105	29.15	34.068	18.095	22.625	26.28	18.094	19.927	26.759
130	Family130	YCE04-55	29.845	37.94	20.42	23.855	29.84	21.6137	25.9013	29.2
131	Family131	00_122	25.86	31.82	15.365	18.79	23.895	16.5063	20.0875	22.8938
132	Family132	07_817	25.815	33.325	17.185	22.75	30.81	15.85	18.59	23.933
133	Family133	138	27.93	36.54	15.975	23.32	28.425
134	Family134	1626	25.29	29.01	15.385	20.51	28.545	13.945	17.8	20.78
135	Family135	65_1240	27.19	35.865	23.59	29.065	31.41	21.5917	24.08	30.2083
136	Family136	65_257	26.625	32.22	14.45	18.7	25.415	18.2688	23.2812	27.5063
137	Family137	666	33.41	40.03	19.385	24.94	31.98	18.215	21.55	25.43
138	Family138	83_88	27.45	34.99	24.51	31.03	39.74	27.4083	32.3458	38.2458
139	Family139	85_177	25.96	29.305	18.735	23.395	30.905	17.295	22.34	28.525
140	Family140	86_368	25.555	31.835	16.715	23.535	29.815	15.705	20.33	25.865
141	Family141	89_113	34.655	41.805	22.535	27.315	32.03	19.49	23.77	27.16
142	Family142	95_988_yin9	29.93	36.67	17.75	22.065	27.96	18.7375	21.1958	22.5021
143	Family143	96_86	22.99	27.825	16.565	22.77	31.685	15.965	20.295	24.465
144	Family144	YCE05-150	26.9	32.175	21.94	28.585	34.045	20.521	24.855	38.448
145	Family145	YCE06-140	26.435	32.75	18.54	23.74	28.805	17.185	24.704	35.044
146	Family146	YCE07-65	28.131	33.98	17.73	22.055	28.474	19.47	21.82	29.815
147	Family147	YCE07-71	23.04	27.49	15.27	19.835	27.25	21.4155	24.16	29.96
148	Family148	YCE07-74						13.631	17.205	24.347
149	Family149	YT-01-23	30.96	36.515	20.59	25.2067	29.8633	23.69	27.205	29.41
150	Family150	YT-01-71	22.75	28.54	15.99	20.835	24.81	18.921	20.736	23.136
151	Family151	YT-03-373	28.021	33.125	18.835	21.77	27.075
152	Family152	YT-07-913_Yue-gan48	23.145	28.535	20.505	23.535	28.165	16.7854	20.9833	31.5892
153	Family153	YT-08-712	25.1475	31.57	18.4625	22.8925	28.6325	23.275	35.125	49.325
154	Family154	YT-08-776	28.185	33.88	22.9	26.775	30.795	24.33	26.14	29.07
155	Family155	YT-55_YT-99-66	26.05	32.505	19.57	23.515	29.07	16.3	18.715	22.54
156	Family156	YT-60_YT-03-393	27.16	32.02	21.425	25.705	30.75	18.955	23.18	29.14
157	Family157	YT-65-1279
158	Family158	YT-83-271
159	Family159	YT-85-177
160	Family160	YT-89-240	32.3	36.86	18.87	23.675	32.72	20.125	22.97	30.54
161	Family161	YT-91-976
162	Family162	YT-94-128	30.965	39.01	23.23	28.505	33.53	21.025	27.795	36.49
163	Family163	YT-96-86	28.615	41.105	29.955	43.59	45.755	25.1125	30.4187	35.775
164	Family164	YT91-77	27.94	34.885	19.285	26.205	34.11	24.64	28.3175	34.28
165	Family165	Yacheng-05-291	33.16	40.96	19.79	25.745	30.465	23.108	27.744	33.323
166	Family166	Yacheng-71-370	36.63	49.495	22.585	29.8	37.825	23.7867	27.9075	32.1029
167	Family167	Yacheng-71-374	33.16	40.35	24.02	33.117	44.655	27.045	33.695	39.525
168	Family168	Yacheng-73-226	25.78	32.075	21.13	28.435	37.18	24.63	31.15	38.125
169	Family169	Yacheng-82-108	40.071	50.175	32.575	40.795	46.475	33.325	38.264	50.923
170	Family170	Yacheng-84-125	27.72	35.33	24.47	27.175	39.46	18.8483	27.3508	34.0625
171	Family171	Yacheng-84-153	24.88	29.91	20.205	25.2	31.845	19.9548	24.7673	30.604
172	Family172	Yacheng-93-26	25.99	35.21	20.74	26.3	30.27	19.02	24.235	26.13
173	Family173	Yacheng-94-30	31.465	40.16	22.515	28.73	33.545	29.0312	37.5083	38.525
174	Family174	Yacheng-94-46	31.69	38.135	23.88	29.495	37.755	18.087	21.321	27.567
175	Family175	Yacheng-94-49						19.0983	24.4017	26.5163
176	Family176	YueGan-47	22	29.8	22.99	30.05	34.655	22.8708	20.9587	26.0388
177	Family177	Yueyin-618	25.015	30.05	15.145	19.365	24.705	16.675	20.51	27.555
178	Family178	Yun-65-225						27.44	30.255	33.56
179	Family179	Yunzhe-89-151	27.785	33.29	19.035	26.715	32.135	25.021	28.436	34.888
180	Family180	Yunzhe-89-351	26.619	34.547	21.42	25.68	31.99	23.425	27.8125	31.1187
181	Family181	Yunzhe-89-391	30.11	33.98	22.655	26.565	32.23	19.953	22.623	27.319
182	Family182	Yunzhe-89-7	28.565	35.965	19.35	24	29.95	20.15	24.395	32.595
183	Family183	Yunzhe-94-343	24.92	30.165	15.205	18.933	26.44	23.105	26.9088	32.6875
184	Family184	Yunzhe-99-155	30.955	39.44	22.165	28.145	34.49	24.585	29.505	36.08
185	Family185	Zhanjiang-245	28.17	37.81	22.04	26.305	33.315	31.4075	45.2112	47.7375
186	Family186	Zhanjiang-258	28.495	36.37	15.56	19.275	24.065	15.53	18.985	23.215
187	Family187	Zhanzhe-34	36.095	40.325	18.105	25.05	30.92	28.255	30.64	34.34
188	Family188	Zhanzhe-40	25.105	28.875	12.715	16.54	21.88	15.125	16.55	19.085
189	Family189	Zhanzhe-45	27.34	34.28	18.63	23.21	29.075	15.879	19.999	23.052
190	Family190	Zhanzhe-495	27.94	34.19	17.066	21.26	27.48	17.992	20.381	23.482
191	Family191	Zhanzhe-50	20.55	26.89	16.17	19.45	22.72	16.393	18.08	20.536
192	Family192	Zhanzhe-80-101	26.709	33.34	18.81	24.27	29.485	30.508	41.069	47.757
193	Family193	Zhuzhe	23.54	30.755	20.75	27.035	33.81	20.61	27.0437	31.605
194	Family194	yuenong-73-204	36.695	46.313	25.02	33.25	38.915	25.19	27.95	34.335
195	Family195	zhan74-141	30.35	36.43	21.805	27.215	32.925	22.945	24.9	30.035
196	Family196	Fu_nong-91-4621	24.4	30.205	14.645	21.18	28.345	17.632	20.183	22.613
197	Family197	K86_110	23.35	30.73	17.755	22.335	31.2	18.829	22.217	25.769
198	Family198	PS01	27.867	33.555	21.35	27.71	31.685	23.225	30.24	33.79
199	Family199	S13	26.14	33.52	26.52	31.78	32.24	27.235	28.05	29.805
200	Family200	gui11	33.11	38.65	23.655	26.74	32.275	24.39	26.24	28.32
201	Family201	gui73_167	30.18	35.96	23.275	29.075	35.6	28.4925	38.3975	35.475
202	Family202	lipu	36.03	41.965	17.9	22.19	27.83	29.391	33.739	38.489
203	Family203	tianye25	27	34.4	18.55	23.39	28.745	17.175	19.1	21.8
204	Family204	yin11	31.775	38.96	17.9	22.62	30.41	18.3317	24.465	28.355
205	Family205	yin2	35.395	43.945	22.18	25.79	31.86	26.9187	32.1005	33.09
206	Family206	yin3	29.405	35.23	17.465	21.68	26.85	16.467	18.115	20.237
207	Family207	yin8	34.78	40.705	20.815	28.91	34.25	21.745	27.98	32.925
208	Family208	yue65_1279	33.365	44.42	22.48	27.62	31.73	26.0154	30.8867	39.3338
209	Family209	yue83_271	23.301	27.385	21.43	28.865	35.87	20.587	24.652	35.16
210	Family210	yue85_177	27.435	31.41	19.86	25.715	32.975	21.93	28.7	35.78
211	Family211	yue91_976	31.205	37.065	17.465	22.585	28.48	22.623	26.353	29.335
212	Family212	yuegan43	24.355	31.81	18.425	21.835	27.885	22.51	26.7	31.425
213	Family213	yuenong91_600_1qingpi	24.585	28.48	20.575	26.735	31.815	17.88	20.815	25.21
214	Family214	yuenong91_600_2dajingweihong	29.95	34.45	22.175	28.735	36.23	21.965	24.685	27.33
215	Family215	yuexuan1hao_jia22	30.705	34.725	22.51	31.755	42.975	29.5038	36.6525	38.5737
216	Family216	yuezhe01_23	24.024	30.91
