# Supplementary material for: Identification of Genetic Loci for Sugarcane Leaf Angle at Different Developmental Stages by Genome-Wide Association Study
Source: Front Plant Sci. 2022 May 27;13:841693. doi: 10.3389/fpls.2022.841693 (PMC9185841; doi:10.3389/fpls.2022.841693)
Supplement: Supplementary Table 3 — Candidate gene information for all the significant loci of sugarcane leaf angle in this study. [file Table_3.XLSX]

## Sheet: Table S3
Chr.	Group	Physical position	P value	Stages
1A	1	36653979	9.59825e-07	E2
1A	1	68079563	2.65453e-06	E2
1A	1	70216053	2.99503e-06	E2
1B	2	49534374	1.80254e-07	E2
2B	6	14853293	1.29048e-06	E2
2C	7	49426153	1.40201e-06	E2
2D	8	22153715	2.25859e-06	E2
2D	8	35269931	2.55956e-06	E2
2D	8	39719298	2.92488e-06	E2
3A	9	19461961	2.74261e-06	E2
3A	9	72027508	1.80622e-06	E2
3D	12	11504961	1.18386e-06	E2
3D	12	58009461	1.85835e-07	E2
4A	13	12734481	2.42144e-06	E2
4A	13	16758464	9.73961e-07	E2
4A	13	38744154	2.95774e-06	E2
4B	14	56887784	3.13297e-06	E2
4B	14	73636860	2.97273e-06	E2
5A	17	38102826	2.1996e-06	E2
5A	17	63761550	2.92957e-06	E2
5A	17	66175004	1.14569e-07	E2
5B	18	49284341	2.96249e-06	E2
5C	19	75042436	2.90486e-06	E2
5D	20	37115747	1.05196e-07	E2
5D	20	47626838	2.02271e-06	E2
5D	20	70499354	6.09991e-07	E2
6A	21	23553408	1.67008e-06	E2
6A	21	58494766	1.51882e-06	E2
6B	22	4300783	3.12137e-06	E2
6C	23	62052972	4.69781e-07	E2
7D	28	56230250	2.4597e-06	E2
8B	30	32283086	5.89292e-07	E2
8C	31	26423070	1.80387e-06	E2
8D	32	523723	1.33971e-06	E2
8D	32	2715386	2.78224e-07	E2
1A	1	71163098	2.4871e-06	E3
1B	2	41223745	1.96791e-06	E3
1D	4	78364835	2.79174e-06	E3
3C	11	22749924	2.6144e-06	E3
4A	13	19685851	1.91122e-06	E3
4A	13	24491356	2.56426e-06	E3
4C	15	17307276	1.16171e-06	E3
4D	16	30723674	1.88315e-06	E3
4D	16	44744063	9.19304e-07	E3
4D	16	69508732	2.21128e-06	E3
4D	16	81790707	8.11563e-07	E3
5A	17	61150612	2.73714e-06	E3
5A	17	64909065	2.51858e-06	E3
5C	19	32484412	1.19045e-06	E3
5C	19	65100296	3.10196e-06	E3
5C	19	67691610	7.21721e-08	E3
5C	19	86542573	4.54407e-07	E3
6A	21	57358963	2.35373e-06	E3
6B	22	24564205	1.7211e-06	E3
6B	22	39216664	2.31167e-06	E3
6C	23	10929525	2.34057e-07	E3
6C	23	71893526	2.65362e-06	E3
6D	24	64487357	2.0608e-06	E3
7A	25	60129648	2.75781e-06	E3
7B	26	31706411	1.3045e-06	E3
7C	27	68147493	1.7345e-07	E3
7C	27	80083979	1.37653e-06	E3
7D	28	49523531	1.10092e-06	E3
7D	28	78968414	1.97269e-06	E3
8A	29	40530589	7.69717e-07	E3
8B	30	50661395	1.953e-06	E3
8D	32	496618	8.78993e-07	E3
8D	32	1245514	9.93096e-07	E3
8D	32	39669459	1.12436e-06	E3
1A	1	38552550	1.94275e-06	E4
1A	1	103158371	1.57089e-06	E4
1C	3	40436758	2.41042e-06	E4
1C	3	53230995	1.38698e-07	E4
1C	3	54797734	1.2006e-06	E4
1C	3	65262454	7.1072e-07	E4
1D	4	41261566	1.03568e-06	E4
1D	4	50234690	1.53766e-06	E4
2A	5	26105683	7.99957e-08	E4
2A	5	39250997	1.33031e-06	E4
2B	6	3734533	1.35297e-06	E4
2B	6	31905017	8.46162e-07	E4
2C	7	61543118	4.45881e-09	E4
3B	10	40824493	1.9858e-07	E4
3B	10	41865270	8.22496e-07	E4
4A	13	28804517	3.06824e-06	E4
4A	13	55507917	4.69137e-08	E4
4A	13	64381034	1.2659e-06	E4
4A	13	69127435	2.35767e-06	E4
4A	13	73068029	4.77622e-07	E4
4B	14	9444606	1.80729e-06	E4
4D	16	72058398	1.85458e-06	E4
5C	19	74653290	2.9223e-06	E4
6B	22	15608335	8.19024e-07	E4
6B	22	48430388	1.44095e-06	E4
6B	22	71834499	8.37626e-07	E4
6B	22	72043013	2.52857e-06	E4
6C	23	46060170	2.2365e-06	E4
6D	24	58289666	2.52752e-06	E4
7A	25	77125674	2.05952e-06	E4
7C	27	58472566	7.9461e-07	E4
7C	27	65862922	2.61235e-06	E4
7C	27	69741947	2.21099e-06	E4
8A	29	16006920	1.75023e-06	E4
8A	29	27467140	1.89931e-06	E4
8A	29	28015022	3.66073e-07	E4
8A	29	30747586	1.45909e-06	E4
8B	30	20521808	2.82639e-06	E4
8B	30	37230216	2.14995e-06	E4
8B	30	41928821	2.44728e-06	E4
8C	31	46528480	3.01147e-06	E4
1A	1	28515625	2.52028e-06	M2
1A	1	98988077	1.28249e-07	M2
1B	2	17121860	3.13805e-06	M2
1B	2	79075472	2.28521e-06	M2
1D	4	69938305	9.80504e-07	M2
2C	7	15886991	3.06774e-06	M2
2C	7	46332898	2.13832e-06	M2
2C	7	48326181	3.13364e-07	M2
2D	8	14481708	2.14054e-06	M2
3A	9	25769260	2.46544e-06	M2
3B	10	29217106	9.14307e-08	M2
3B	10	38689344	2.56815e-06	M2
3C	11	9555721	2.207e-06	M2
3C	11	9697794	2.15594e-06	M2
3C	11	77332919	2.80756e-06	M2
3D	12	1353284	2.34537e-06	M2
3D	12	12045238	2.86465e-06	M2
3D	12	35138241	1.4227e-06	M2
4A	13	35296300	1.24567e-07	M2
4B	14	14410563	9.1217e-08	M2
4B	14	16017995	3.06892e-06	M2
5A	17	681426	2.16385e-06	M2
5A	17	34282971	2.04258e-06	M2
5B	18	32514126	9.71665e-07	M2
5B	18	63146208	1.71696e-06	M2
5B	18	64069555	1.23737e-06	M2
5D	20	46268543	1.92613e-06	M2
6A	21	99469275	1.72077e-06	M2
6B	22	14206397	1.89946e-06	M2
6B	22	45307776	1.08319e-06	M2
6B	22	72411451	4.37755e-07	M2
7A	25	20560551	2.03511e-07	M2
7A	25	21160412	2.86199e-06	M2
7A	25	46964544	1.8594e-06	M2
7A	25	64237053	7.14034e-07	M2
7D	28	80837498	7.46467e-07	M2
8A	29	3717785	2.62316e-06	M2
8C	31	7157502	2.03515e-06	M2
1C	3	46465102	2.50343e-06	M3
2C	7	17516090	3.77318e-07	M3
2C	7	36872863	1.74192e-06	M3
2D	8	31742855	5.91176e-08	M3
2D	8	70250218	1.45131e-06	M3
3A	9	74494353	3.15526e-06	M3
3B	10	4810461	2.88029e-07	M3
3B	10	54659040	1.84073e-06	M3
3B	10	72591336	3.56135e-08	M3
4D	16	10797201	1.45004e-06	M3
4D	16	20649784	1.44394e-06	M3
4D	16	64745313	6.58728e-07	M3
5A	17	54875285	5.99966e-07	M3
5B	18	51883256	1.18783e-06	M3
5B	18	62190355	3.08852e-07	M3
5B	18	90438375	1.1978e-06	M3
5C	19	4679369	7.13208e-07	M3
5C	19	42350640	1.31466e-06	M3
5C	19	55871929	2.81552e-06	M3
5D	20	39152239	2.61294e-06	M3
5D	20	57849220	2.99205e-06	M3
6A	21	17030580	3.01741e-06	M3
6A	21	44874649	1.95381e-06	M3
6A	21	59735960	2.58355e-06	M3
6A	21	69630992	2.84965e-06	M3
6A	21	78380855	1.57279e-06	M3
6C	23	72748370	1.97643e-06	M3
6C	23	91976468	2.35813e-06	M3
6D	24	26327616	2.09604e-06	M3
6D	24	38344387	2.05827e-07	M3
6D	24	73883862	2.4384e-06	M3
7A	25	7148558	2.16239e-06	M3
7A	25	59052821	1.37731e-06	M3
7C	27	16064577	1.33626e-07	M3
7C	27	85337062	8.64419e-07	M3
7D	28	67815942	1.54748e-06	M3
7D	28	70224011	2.0447e-06	M3
7D	28	83343351	2.4747e-06	M3
8B	30	54468393	3.56917e-07	M3
8C	31	50980164	8.24893e-07	M3
1A	1	94700903	1.13918e-06	M4
2A	5	2070597	1.1583e-06	M4
2A	5	22576594	2.81268e-06	M4
2B	6	103786017	7.92431e-07	M4
2C	7	4259843	2.85046e-06	M4
3B	10	6203459	1.24043e-06	M4
3C	11	45528831	2.40535e-06	M4
4A	13	15006151	1.52515e-06	M4
4B	14	22403812	1.36173e-06	M4
5A	17	55473803	1.02999e-06	M4
5A	17	70420974	1.26367e-06	M4
5B	18	73635526	8.65901e-07	M4
5C	19	5766478	8.8717e-07	M4
5C	19	35356006	1.6029e-06	M4
5C	19	49568239	2.90646e-06	M4
5C	19	57482451	1.60132e-06	M4
6A	21	27863791	1.08938e-06	M4
6A	21	31510285	1.38467e-06	M4
6A	21	53870145	1.34504e-06	M4
6A	21	68204529	2.53917e-06	M4
6B	22	44163567	1.72268e-06	M4
6C	23	33067439	2.40964e-06	M4
6C	23	57776283	2.96015e-06	M4
6C	23	81948947	1.34733e-06	M4
6D	24	29287300	2.23407e-06	M4
7A	25	18184994	1.99163e-06	M4
7A	25	39792757	5.16974e-08	M4
7C	27	15841118	7.01494e-07	M4
7C	27	41707508	2.02324e-06	M4
7D	28	18187631	2.9033e-06	M4
7D	28	50418256	1.98905e-06	M4
7D	28	75376544	2.51461e-06	M4
8C	31	42158304	3.07469e-06	M4
8D	32	52438401	2.47854e-06	M4
1A	1	29937335	2.42362e-06	S2
1A	1	85398079	1.59479e-06	S2
1A	1	92849828	2.64382e-06	S2
1B	2	42159728	3.56238e-07	S2
1B	2	68148861	6.59861e-07	S2
1B	2	74926100	1.98995e-06	S2
1B	2	119756413	6.0317e-07	S2
1C	3	25930074	2.60121e-06	S2
1C	3	71378683	2.82791e-06	S2
1D	4	82290294	1.47015e-08	S2
2C	7	32239102	9.85545e-07	S2
2D	8	15740688	1.7748e-06	S2
2D	8	33525553	2.27623e-06	S2
3A	9	3234407	9.39737e-07	S2
3C	11	13598943	5.35638e-07	S2
3C	11	21797718	2.2856e-06	S2
3C	11	27565010	2.76219e-06	S2
3D	12	61156065	1.33612e-06	S2
4A	13	7324803	2.26811e-06	S2
4A	13	30339297	8.9393e-07	S2
4A	13	32102288	3.99607e-07	S2
4A	13	44301393	5.18299e-07	S2
4A	13	51223571	2.96312e-06	S2
4B	14	30194375	1.08317e-06	S2
4C	15	40683909	2.05717e-06	S2
4D	16	6021030	1.06776e-07	S2
4D	16	26789142	2.94963e-06	S2
4D	16	39719385	7.59173e-07	S2
4D	16	53958786	5.72473e-07	S2
5A	17	43039019	1.003e-06	S2
5A	17	88545234	4.11433e-07	S2
5B	18	15660590	2.87827e-06	S2
5B	18	54279838	7.8469e-08	S2
5B	18	61730537	2.16043e-06	S2
5C	19	87933475	2.34301e-06	S2
5D	20	2010341	1.2101e-06	S2
5D	20	51442885	1.44995e-06	S2
6A	21	82662075	2.82644e-06	S2
6A	21	101362211	2.6094e-06	S2
6C	23	73421255	1.34207e-06	S2
7C	27	37608343	4.36314e-07	S2
8C	31	1674319	1.88849e-06	S2
8D	32	1941989	2.86963e-06	S2
1A	1	75090373	1.72672e-06	S3
1A	1	97786094	5.95651e-07	S3
1B	2	70469690	1.13873e-06	S3
1C	3	950948	2.82001e-07	S3
2B	6	36519254	1.54349e-06	S3
2C	7	41380788	1.93654e-06	S3
3B	10	69621417	2.16085e-06	S3
3C	11	16295676	6.22725e-07	S3
4A	13	66814460	2.24709e-06	S3
4C	15	28852017	1.8085e-06	S3
4D	16	56343934	2.17719e-06	S3
5A	17	37667325	2.49059e-06	S3
5C	19	85860750	1.12464e-06	S3
5D	20	23298209	3.13926e-06	S3
5D	20	30823969	3.07049e-06	S3
5D	20	36874927	1.51534e-06	S3
5D	20	59596424	2.50302e-06	S3
5D	20	84316309	1.36755e-06	S3
6B	22	62305266	1.07825e-06	S3
6B	22	70932922	2.82838e-06	S3
6D	24	25121177	9.07173e-07	S3
7C	27	21289318	2.90064e-06	S3
7C	27	73214885	1.84921e-06	S3
